# Supplementary material for: Contextualizing Breast Implant Removal Patterns with Google Trends: Big Data Applications in Surgical Demand
Source: PubMed Central journal article supplement — Plast Reconstr Surg Glob Open. 2022 Jan 5;10(1):e4005. doi: 10.1097/GOX.0000000000004005 (PMC8812673; doi:10.1097/gox.0000000000004005), 2022-01-05
Supplement: gox-10-e4005-s002.pdf [file gox-10-e4005-s002.pdf]

**SDC 1:**

| <b>Year</b> | <b>RSV for “Breast Implant<br/>Removal+Explant”</b> | <b>Correction Factor<br/>(<math>RSV_{year}/100</math>)</b> |
|-------------|-----------------------------------------------------|------------------------------------------------------------|
| 2006        | 24                                                  | 0.24                                                       |
| 2007        | 23                                                  | 0.23                                                       |
| 2008        | 20                                                  | 0.20                                                       |
| 2009        | 20                                                  | 0.20                                                       |
| 2010        | 19                                                  | 0.19                                                       |
| 2011        | 20                                                  | 0.20                                                       |
| 2012        | 24                                                  | 0.24                                                       |
| 2013        | 28                                                  | 0.28                                                       |
| 2014        | 26                                                  | 0.26                                                       |

|      |    |      |
|------|----|------|
| 2015 | 25 | 0.25 |
| 2016 | 36 | 0.36 |
| 2017 | 38 | 0.38 |
| 2018 | 50 | 0.50 |
| 2019 | 80 | 0.80 |
