# Supplementary material for: Contextualizing Breast Implant Removal Patterns with Google Trends: Big Data Applications in Surgical Demand
Source: PubMed Central journal article supplement — Plast Reconstr Surg Glob Open. 2022 Jan 5;10(1):e4005. doi: 10.1097/GOX.0000000000004005 (PMC8812673; doi:10.1097/gox.0000000000004005), 2022-01-05
Supplement: gox-10-e4005-s003.pdf [file gox-10-e4005-s003.pdf]

**SDC 2:**

| <b>Year</b> | <b>RSV for “Breast Augmentation”</b> | <b>Correction Factor<br/>(<math>RSV_{year}/100</math>)</b> |
|-------------|--------------------------------------|------------------------------------------------------------|
| 2006        | 72                                   | 0.72                                                       |
| 2007        | 75                                   | 0.75                                                       |
| 2008        | 58                                   | 0.58                                                       |
| 2009        | 56                                   | 0.56                                                       |
| 2010        | 53                                   | 0.53                                                       |
| 2011        | 57                                   | 0.57                                                       |
| 2012        | 57                                   | 0.57                                                       |
| 2013        | 56                                   | 0.56                                                       |
| 2014        | 49                                   | 0.49                                                       |

|      |    |      |
|------|----|------|
| 2015 | 44 | 0.44 |
| 2016 | 49 | 0.49 |
| 2017 | 47 | 0.47 |
| 2018 | 45 | 0.45 |
| 2019 | 39 | 0.39 |
